## ETHER INSUFFLATION BOTTLE

Numerous devices for ether insufflation have been described and marketed. These devices range from the more expensive motor driven machines to the simply constructed "ether bottle."

The device illustrated consists essentially of a quart fruit jar of the glass top variety, a metal jar top taken from the humidifying bottle of an intranasal oxygen set and a

soldered to the top of the vaporizer. To this connection is fastened a length of rubber tubing which leads to the source of air or oxygen used in vaporizing the ether. To the second connection in the jar top another length of rubber tubing is fastened. This tube carries the vaporized ether to the patient.

The bottle described has the advantage

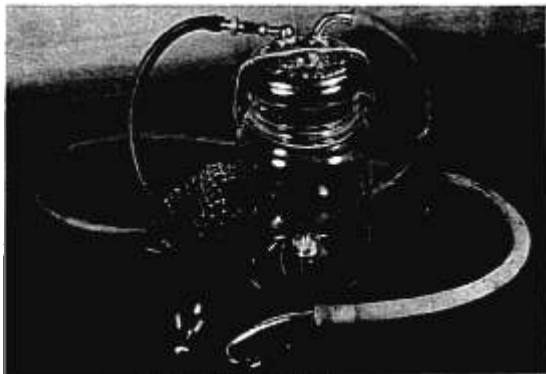

FIG. 1. Ether insufflation bottle.

vaporizer found in the bubble type ether vaporizer.\*

The vaporizer which extends to the bottom of the fruit jar is soldered firmly in place in one of the openings of the metal jar top. Suitable connections are also

\* Bottle is ordinary Atlas Mason jar, metal top is manufactured by the Emerson Company of Cambridge, Massachusetts, and the ether vaporizer tube is a product of Foregger, New York City.

over many similar devices in that it is easily constructed, furnishes a tight leak proof system, sufficient ether may be placed in the jar to give greater vaporization and all broken parts may be easily replaced. If greater vaporization of ether is needed the entire jar may be placed in a container of warm water to facilitate vaporization.

JOE BAIRD, M.D.,  
Hartford Hospital,  
Hartford, Conn.
